# Supplementary material for: Structural basis for polymerase η–promoted resistance to the anticancer nucleoside analog cytarabine
Source: Sci Rep. 2018 Aug 23;8:12702. doi: 10.1038/s41598-018-30796-w (PMC6107656; doi:10.1038/s41598-018-30796-w)
Supplement: Supplementary file 1 — Supplementary Information [file 41598_2018_30796_MOESM1_ESM.pdf]

## **SUPPLEMENTARY INFORMATION**

### **Structural basis for polymerase $\eta$ -promoted resistance to the anticancer nucleoside analog cytarabine**

Olga Rechkoblit, Jayati Roy Choudhury, Angeliki Buku, Louise Prakash, Satya Prakash, and Aneel K. Aggarwal

Supplementary Figures 1 and 2

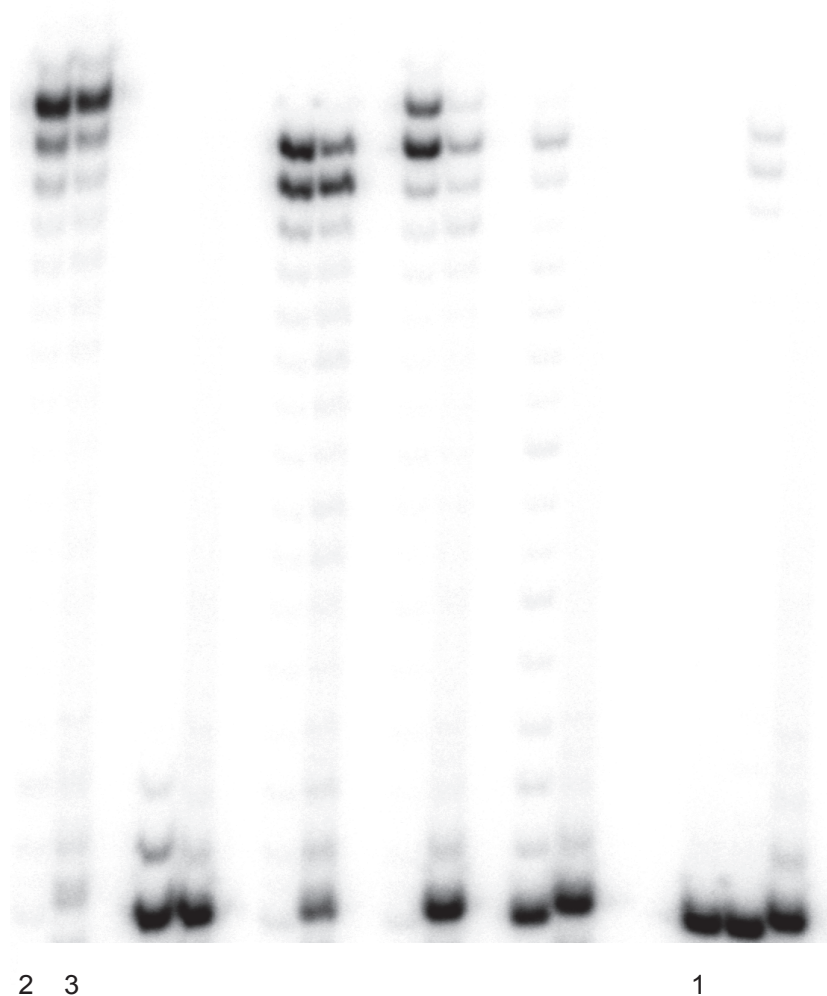

Lane no: 2 3

1

Supplementary Figure 1

**Supplementary Figure 1. The original gel related to Fig. 2A.**

Extension of  $^{32}\text{P}$  5'-endlabeled 23-nt primer with the unmodified C or AraC residues at the 3'-end bound to the 5'-...CCTAAGA...-3' 39-nt template in the presence of dATP, dGTP, and dTTP. Lane 1, unmodified DNA substrate; Lane 2, extension from the unmodified C; Lane 3, extension from AraC. To produce Fig. 2A, lane 1 and lanes 2 and 3 were cropped from different parts of the gel and aligned together. Thus, in Fig. 2A, lane 1 is separated from lanes 2 and 3 with white space. All extension reactions were conducted at 37°C for 10 min.

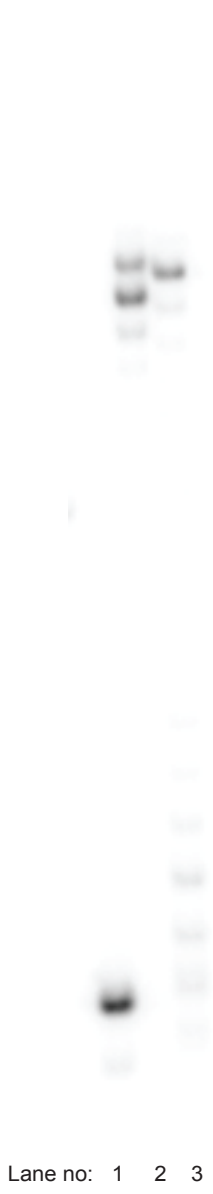

Lane no: 1 2 3

Supplementary Figure 2

**Supplementary Figure 2. The original gel related to Fig. 2B.**

Extension with the 5'-...GGGGGGA...-3' 39-nt template. Lane 1, unmodified DNA substrate; Lane 2, extension from the unmodified C in the presence of dATP, dGTP, dTTP and dCTP; Lane 3, extension from the AraC in the presence of dATP, dGTP, dTTP and AraCTP. All extension reactions were conducted at 37°C for 10 min.
